# Supplementary material for: Accelerated alkaline activation of peroxydisulfate by reduced rubidium tungstate nanorods for enhanced degradation of bisphenol A
Source: Royal Society of Chemistry journal article supplement (doi:10.1039/d0en00840k), 2020-01-01
Supplement: d0en00840k1.pdf [file d0en00840k1.pdf]

## **Supporting Information**

### **Accelerated alkaline activation of peroxydisulfate by reduced rubidium tungstate nanorods for enhanced degradation of bisphenol A**

Jian Hu, Xiangkang Zeng\*, Yichun Yin, Yue Liu, Yang Li, Xiaoyi Hu, Lian Zhang, Xiwang  
Zhang

Department of Chemical Engineering, Monash University, Clayton, Victoria 3800, Australia

\*Corresponding authors.

E-mail address: xiangkang.zeng@monash.edu (X. Zeng).

Text S1. Effects of  $\text{HCO}_3^-$  groups.

The BPA degradation efficiency was dramatically decreased from 92.0% to 35.2% when  $\text{HCO}_3^-$  coexists in the alkaline rRT/PDS system. After further investigation, the  $\text{HCO}_3^-$  affects the reaction in the following two aspects. Firstly, the pH of the solution decreased to 9.3 after adding 50 mM  $\text{HCO}_3^-$  groups since  $\text{HCO}_3^-$  can react with  $\text{OH}^-$  groups to generate  $\text{CO}_3^{2-}$  and  $\text{H}_2\text{O}$  (Eq. S1). According to the result in Fig. 3a, lower pH will result in a decrease of BPA degradation. Hence the degradation efficiency of BPA was affected a lot. Secondly,  $\text{HCO}_3^-$  can quench  $\text{SO}_4^{\cdot-}$  and  $\cdot\text{OH}$  and generate  $\text{CO}_3^{\cdot-}$  and  $\text{HCO}_3^{\cdot-}$  radicals (Eqs. S2-S5)<sup>2</sup>. According to the previous study of Hu et al.<sup>1</sup>,  $\text{CO}_3^{\cdot-}$  and  $\text{HCO}_3^{\cdot-}$  radicals can also contribute to BPA degradation. Therefore, it would be hard to investigate the exact reason why the presence of  $\text{HCO}_3^-$  reduced BPA degradation in this reaction.

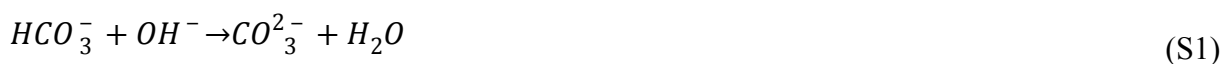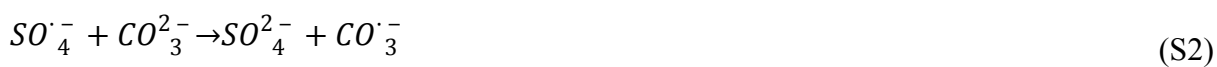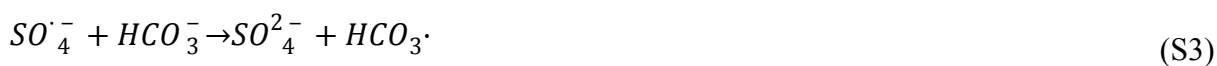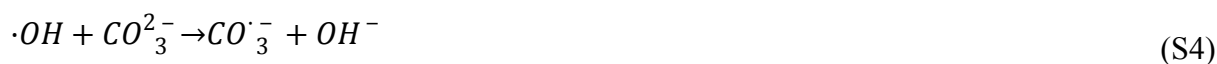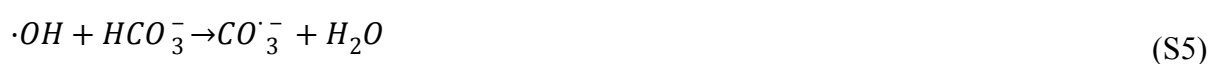

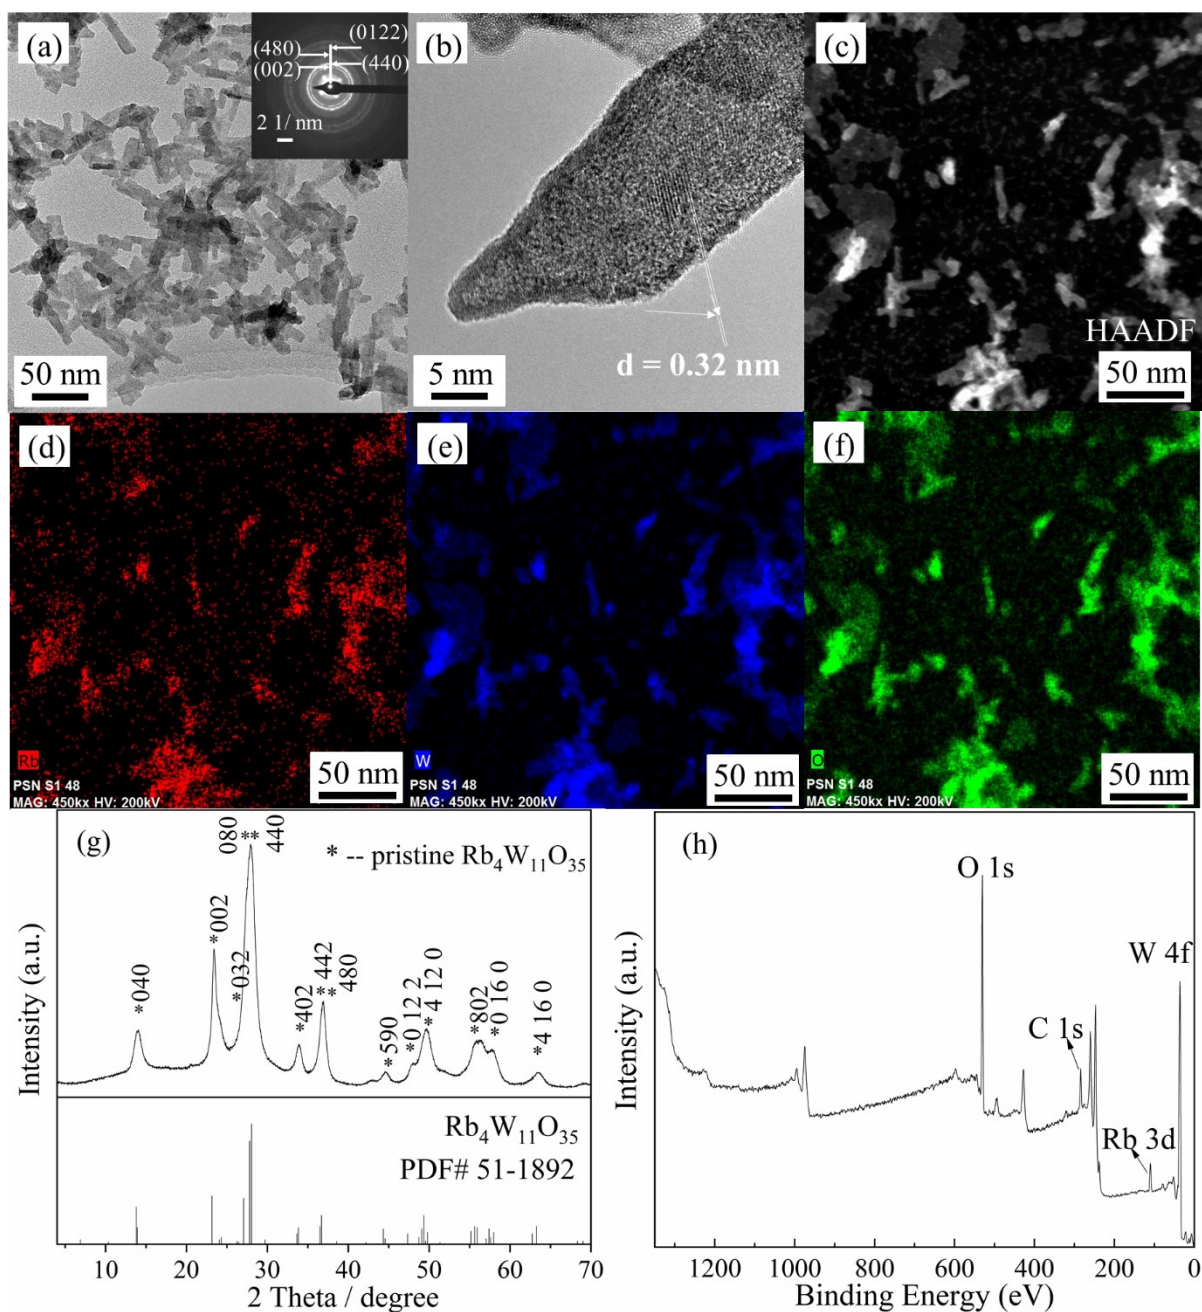

**Figure. S1.** (a) TEM and (b) HRTEM images of pristine  $\text{Rb}_4\text{W}_{11}\text{O}_{35}$  materials. (c) HAADF-STEM image and (d) rubidium, (e) tungsten and (f) oxygen elemental mapping images of pristine  $\text{Rb}_4\text{W}_{11}\text{O}_{35}$ . (g) XRD pattern and (h) XPS survey spectra of the pristine  $\text{Rb}_4\text{W}_{11}\text{O}_{35}$  nanorods.

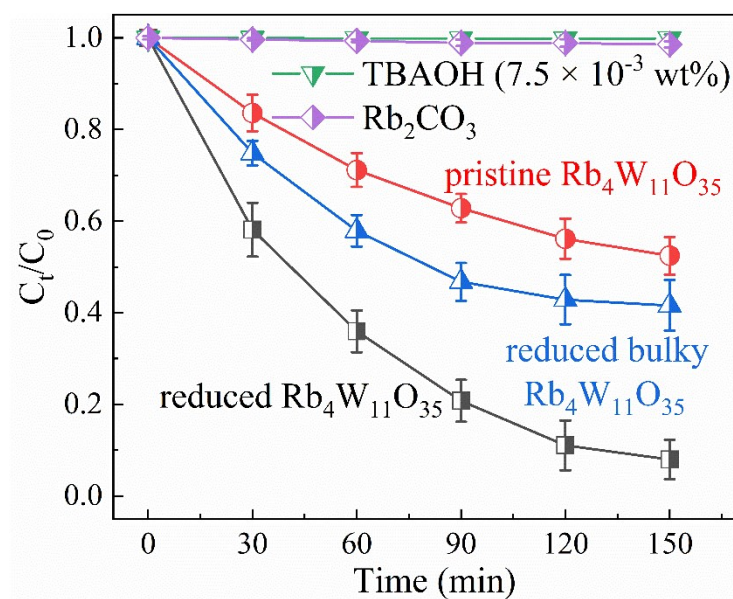

**Figure. S2.** The BPA removal efficiency by reduced  $\text{Rb}_4\text{W}_{11}\text{O}_{35}$  nanorods, reduced bulk  $\text{Rb}_4\text{W}_{11}\text{O}_{35}$ , pristine  $\text{Rb}_4\text{W}_{11}\text{O}_{35}$ ,  $\text{Rb}_2\text{CO}_3$  and TBAOH. Reaction conditions: 2  $\mu\text{M}$  catalysts, 20 mM PDS, 5 mg/L BPA, initial pH = 11.0,  $T = 293$  K.

**Table S1.** Comparison of different catalysts for base activation of PDS.

| Catalyst                                                            | Pollutants (mM)       | PDS dosage (mM) | Catalyst dosage (g/L)                                    | pH values | Time used for removal | Pseudo first-order rate constant ( <i>k</i> ) | R <sup>2</sup> values | References |
|---------------------------------------------------------------------|-----------------------|-----------------|----------------------------------------------------------|-----------|-----------------------|-----------------------------------------------|-----------------------|------------|
| NaHCO <sub>3</sub>                                                  | Acetaminophen, 0.01   | 10              | 2.1                                                      | 8.3       | 7 h, 70%              | 0.17 h <sup>-1</sup>                          | -                     | 3          |
| Glucose                                                             | Nitrobenzene, 1       | 200             | 0.9                                                      | 12.5      | 8h, 98%               | -                                             | -                     | 4          |
| Mn <sub>0.6</sub> Zn <sub>0.4</sub> -Fe <sub>2</sub> O <sub>4</sub> | BPA, 0.1              | 5               | 0.5                                                      | 9.0       | 60min, 78%            | -                                             | -                     | 5          |
| Magnetite/Cu <sup>2+</sup>                                          | Anisole, 0.1          | 1.1             | Magnetite- 0.5<br>Cu <sup>2+</sup> -6.4×10 <sup>-3</sup> | 11.0      | 22h,58%               | -                                             | -                     | 6          |
| Carbon nanotubes                                                    | Phenol, 0.1           | 1.0             | 0.1                                                      | 11.0      | 60min, 90%            | 0.0146 min <sup>-1</sup>                      | 0.935                 | 7          |
| rGO-Ag <sub>0</sub> /Fe <sub>3</sub> O <sub>4</sub>                 | BPA, 0.01             | 1.0             | 0.1                                                      | 10.0      | 3h, 20%               | -                                             | -                     | 8          |
| reduced Rb <sub>4</sub> W <sub>11</sub> O <sub>35</sub>             | BPA, 0.02<br>(5 mg/L) | 20              | 5.8×10 <sup>-3</sup> g/L (2 μM)                          | 11.0      | 150 min, 92 %         | 0.0173 min <sup>-1</sup>                      | 0.9957                | This work  |

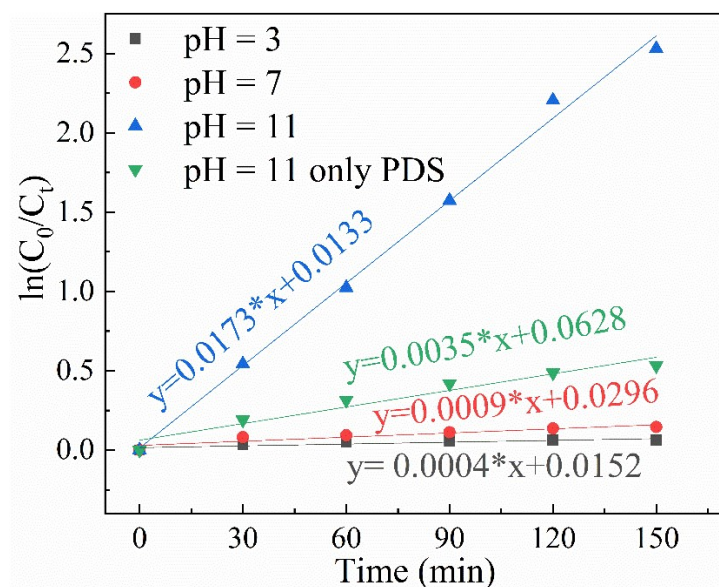

**Figure. S3.** Pseudo first-order kinetic curves of BPA removal under different initial pH values and conditions. Reaction conditions: 2  $\mu\text{M}$  reduced  $\text{Rb}_4\text{W}_{11}\text{O}_{35}$  nanorods, 20 mM PDS, 5 mg/L BPA,  $T = 293\text{ K}$ .

**Table S2.** Comparison of pseudo first-order rate constants under different initial pH values and conditions.

| pH            | Pseudo first-order rate constant ( $k_{\text{obs}}$ , $\text{min}^{-1}$ ) | $R^2$ values |
|---------------|---------------------------------------------------------------------------|--------------|
| 3             | 0.0004                                                                    | 0.8025       |
| 7             | 0.0009                                                                    | 0.8628       |
| 11            | 0.0173                                                                    | 0.9957       |
| 11 (only PDS) | 0.0035                                                                    | 0.9458       |

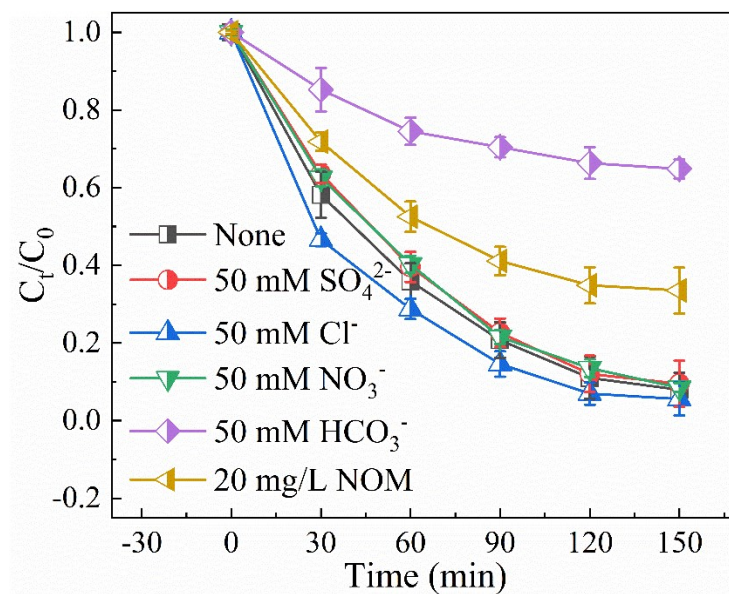

**Figure. S4.** Effects of inorganic anions  $\text{SO}_4^{2-}$ ,  $\text{Cl}^-$ ,  $\text{NO}_3^-$ ,  $\text{HCO}_3^-$  and NOM on the degradation of BPA in the alkaline rRT/PDS system. Reaction conditions: 2  $\mu\text{M}$  reduced  $\text{Rb}_4\text{W}_{11}\text{O}_{35}$  nanorods, 20 mM PDS, 5 mg/L BPA, initial pH = 11.0,  $T = 293$  K.



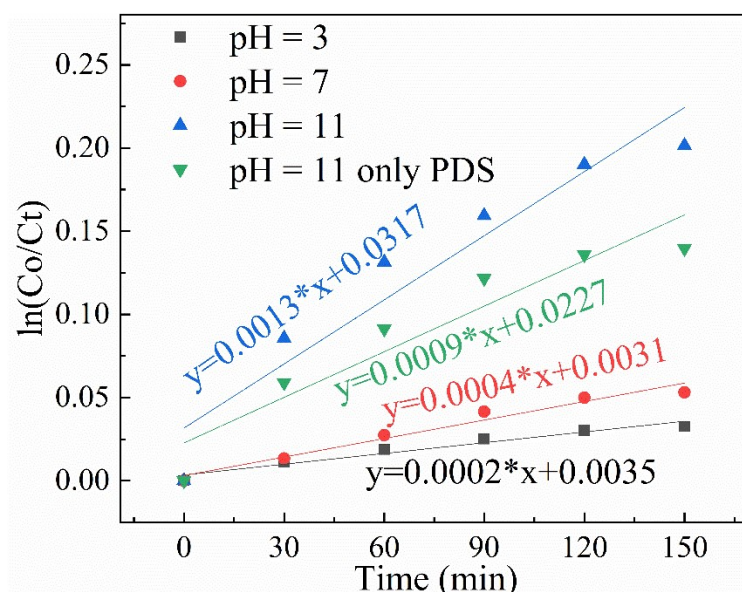

**Figure. S5.** Pseudo first-order kinetic curves of PDS decomposition under different initial pH values and conditions. Reaction conditions: 2  $\mu\text{M}$  reduced  $\text{Rb}_4\text{W}_{11}\text{O}_{35}$  nanorods, 20 mM PDS, 5 mg/L BPA,  $T = 293 \text{ K}$ .

**Table S3.** Comparison of pseudo first-order rate constants of PDS decomposition under different initial pH values and conditions.

| pH            | Pseudo first-order rate constant ( $k_{\text{obs}}, \text{min}^{-1}$ ) | $R^2$ values |
|---------------|------------------------------------------------------------------------|--------------|
| 3             | 0.0002                                                                 | 0.9532       |
| 7             | 0.0004                                                                 | 0.9653       |
| 11            | 0.0013                                                                 | 0.914        |
| 11 (only PDS) | 0.0009                                                                 | 0.8989       |



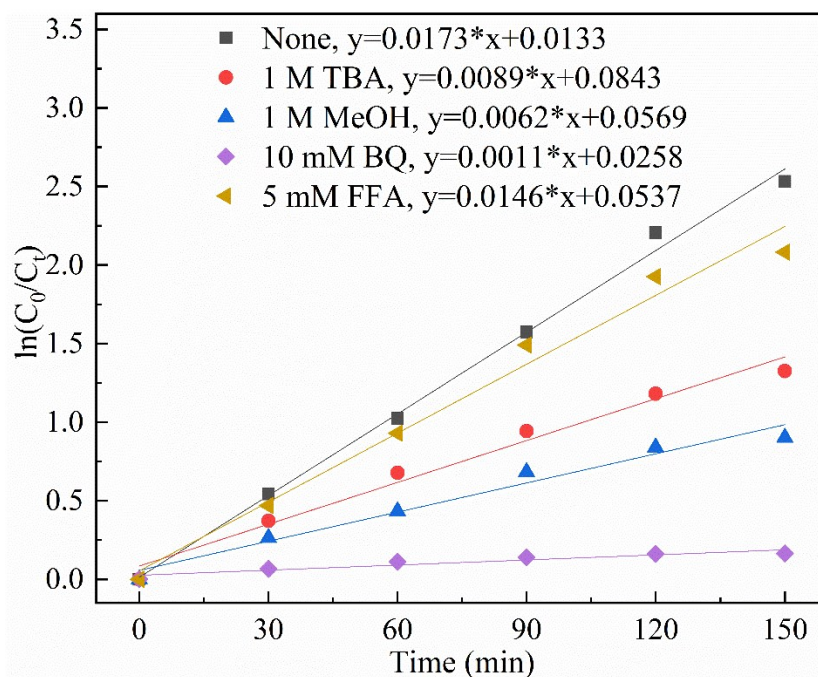

**Figure. S6.** Pseudo first-order kinetic curves of each quenching test. Reaction conditions: 2  $\mu$ M reduced  $\text{Rb}_4\text{W}_{11}\text{O}_{35}$  nanorods, 20 mM PDS, 5 mg/L BPA, initial pH = 11.0,  $T = 293$  K.

**Table S4.** Comparison of pseudo first-order rate constants under different quenching tests.

| Radicals<br>Scavengers | Pseudo first-order rate<br>constant ( $k_{\text{obs}}$ , $\text{min}^{-1}$ ) | $R^2$ values |
|------------------------|------------------------------------------------------------------------------|--------------|
| none                   | 0.0173                                                                       | 0.9957       |
| 1 M TBA                | 0.0089                                                                       | 0.9809       |
| 1 M MeOH               | 0.0062                                                                       | 0.9724       |
| 10 mM BQ               | 0.0011                                                                       | 0.9025       |
| 5 mM FFA               | 0.0146                                                                       | 0.9826       |

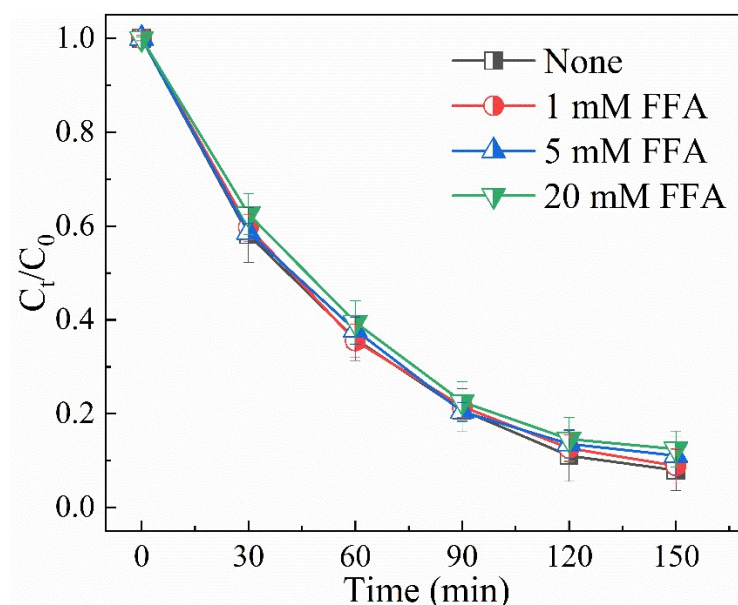

**Figure. S7.** Effect of FFA with different concentrations: 1, 5 and 20 mM on the degradation of BPA. Reaction conditions: 2  $\mu$ M reduced  $\text{Rb}_4\text{W}_{11}\text{O}_{35}$  nanorods, 20 mM PDS, 5 mg/L BPA, initial pH = 11.0,  $T = 293$  K.

#### References:

1. L. Hu, G. Zhang, M. Liu, Q. Wang and P. Wang, Enhanced degradation of Bisphenol A (BPA) by peroxymonosulfate with  $\text{Co}_3\text{O}_4\text{-Bi}_2\text{O}_3$  catalyst activation: effects of pH, inorganic anions, and water matrix, *Chemical Engineering Journal*, 2018, **338**, 300-310.
2. A. Ghauch and A. M. Tuqan, Oxidation of bisoprolol in heated persulfate/ $\text{H}_2\text{O}$  systems: kinetics and products, *Chemical Engineering Journal*, 2012, **183**, 162-171.
3. M. Jiang, J. Lu, Y. Ji and D. Kong, Bicarbonate-activated persulfate oxidation of acetaminophen, *Water research*, 2017, **116**, 324-331.
4. R. J. Watts, M. Ahmad, A. K. Hohner and A. L. Teel, Persulfate activation by glucose for in situ chemical oxidation, *Water research*, 2018, **133**, 247-254.
5. B. Deng, Y. Li, W. Tan, Z. Wang, Z. Yu, S. Xing, H. Lin and H. Zhang, Degradation of bisphenol A by electro-enhanced heterogeneous activation of peroxydisulfate using Mn-Zn ferrite from spent alkaline Zn-Mn batteries, *Chemosphere*, 2018, **204**, 178-185.
6. J. Chen, X. Zhou, Y. Zhu, Y. Zhang and C.-H. Huang, Synergistic Activation of Peroxydisulfate with Magnetite and Copper Ion at Neutral Condition, *Water Research*, 2020, 116371.
7. W. Ren, L. Xiong, X. Yuan, Z. Yu, H. Zhang, X. Duan and S. Wang, Activation of peroxydisulfate on carbon nanotubes: Electron-transfer mechanism, *Environmental science & technology*, 2019, **53**, 14595-14603.
8. C. M. Park, J. Heo, D. Wang, C. Su and Y. Yoon, Heterogeneous activation of persulfate by reduced graphene oxide–elemental silver/magnetite nanohybrids for the oxidative degradation of pharmaceuticals and endocrine disrupting compounds in water, *Applied Catalysis B: Environmental*, 2018, **225**, 91-99.
